# Supplementary material for: Co-adsorption of electrolyte and protein to Ag colloid observed by surface-enhanced Raman scattering
Source: Royal Society of Chemistry journal article supplement (doi:10.1039/c0an00150c), 2010-01-01
Supplement: c0an00150c.pdf [file c0an00150c.pdf]

## Supplementary Information Available

**Materials** Silver nitrate, sodium citrate and citrate acid were obtained from Wako Co. Ltd. (Osaka, Japan). Lysozyme from chicken egg white and insulin from porcine pancreas were from ICN Biomedicals Inc (Aurora, Ohio) and Sigma (St Louis, MO, USA), respectively. All the materials were used without further purification. Eppendorf tubes were purchased from Eppendorf Company (Hamburg, Germany). Triply distilled water was used throughout the study.

**Preparation of silver colloid.** The citrate-reduced silver colloidal solution used in this study was synthesized according to a modified Lee and Meisel method.<sup>1,2</sup> In brief, 90 mg of silver nitrate was dissolved in 500 ml of water and was refluxed to boil under stirring. Ten milliliters of 1% (w/v) sodium citrate was added to the solution right after the boiling started. The solution was kept boiling for 15 min. Then, the silver colloidal solution was placed in an ice bath to stop immediately the reduction. An UV absorption peak of the silver colloid was observed at 445 nm. This batch of silver colloid was aged for 6 months at 4 °C before used. All the study in the present work used this batch of colloidal silver, except for the semi-quantitative study of insulin in Figure 3, where a new batch of silver colloid (UV absorption peak is at 431 nm) was used freshly (within 24 h after preparation).

**Sample preparation for SERS study.** 500  $\mu$ L of 5 mM citrate buffer solution (pH=3.7) containing 12 mM NaNO<sub>3</sub> was added to 500  $\mu$ L of the prepared silver colloid solution in 2 mL EP tube (No obvious aggregation was observed in this mixture).

---

Then, 10  $\mu\text{L}$  of protein solution obtained by dissolving proteins in pure water was added to the above 1 mL mixture (The pH of the final protein-colloid solution was 4.0. The aggregation of the colloidal silver was observed upon the addition of protein). Then, the protein-colloid solution was immediately shaken bottom to up by hand for 40 seconds during which one cycle of bottom to up and up to bottom spent 1 s. After that, the mixture was standed for 40s. Subsequently, removal of 30  $\mu\text{L}$  of the mixture on an aluminum pan plate (0219-0062, Perkin Elmer) followed by heating at 100°C. The SERS sample was completely dry after 210 seconds heating. For quantitative study in Figure 3, 60  $\mu\text{L}$  of the sample was used to dry.

Notes: In Figure 3(C), when the concentration is much lower than monolayer coverage which is estimated to be  $1.4 \times 10^{-7}$  M, the spectra ( (e), (f) ) suffer from citrate bands ( $1393, 1031, 947, 838, 798 \text{ cm}^{-1}$ )<sup>2</sup>, whether this background is related to the freshness of the silver colloid is still under investigation in our group.

**SERS and normal Raman measurements.** All SERS and normal Raman spectra were measured by a compact macroscopic Raman spectrometer ( $\lambda_{\text{ex}}=785 \text{ nm}$ ), HoloProbe VPT system manufactured by Kaiser Optical Systems (Ann Arbor, MI, USA). The spot size of laser beam at the sample position was 10  $\mu\text{m}$ . The laser power was 6 mW at the sample position, and the exposure time for each SERS measurement was set to be 20s with 1 accumulation. As for SERS spectra, each datum indicates an average of 15 measurements (in 3 plates, each plate was measured at 5 different points) and each error indicates the standard deviation.

**UV absorption measurements.** Every absorption spectrum was obtained 5 min after addition of protein solution or pure water (control) into silver colloid with a Shimadzu UV-3101 UV/vis spectrometer at room temperature.

**Calculation of lysozyme concentraion for monolayer coverage of colloidal silver.**

The UV plasmon peak of the prepared silver colloidal particles is at 445 nm, corresponding to the size of 60 nm in average. By approximation of the silver colloid to an ideal sphere, the cross section of each silver particle,  $\epsilon$  was calculated to be  $1.264 \times 10^{10} \text{ cm}^2$  using Mie theory. According to the equation.

$$\text{absorption} = \epsilon (\text{cm}^2) \times \text{particle number} (\text{cm}^{-3}) \times \text{length of a UV cell used (cm)},$$

the number of silver particle was obtained to be  $5.55 \times 10^{10} \text{ cm}^{-3}$ . This silver colloid solution was diluted by two fold using sodium citrate buffer. Therefore, the particle number becomes  $2.78 \times 10^{10} \text{ cm}^{-3}$  ( $2.78 \times 10^{13} \text{ L}^{-1}$ ), that is,  $4.61 \times 10^{-11} \text{ M}$ . As the size of lysozyme is ca.  $4.6 \times 3 \times 3 \text{ nm}$ , there are two positions for lysozyme to adsorb to the surface of silver particle, namely, lying down and standing up. As for the lying down position, each 60 nm silver particle could coverage 1210 lysozyme molecules while the number is 1760 for the standing up position. Accordingly, the monolayer coverage concentration of lysozyme is estimated to be  $5.6 \times 10^{-8} \text{ M}$  and  $8.1 \times 10^{-8} \text{ M}$ , respectively, for the lying down and standing up positions. The real case should be between these two values. The size of insulin is ca.  $2 \times 2.5 \times 3 \text{ nm}$  which was approximated to be a 2.5 nm sphere and the concentration of monolayer coverage is calculated to be  $1.4 \times 10^{-7} \text{ M}$ .

Table 1 Wavenumbers and band assignments for normal Raman spectra of solid lysozyme and inulin and SERS spectra of lysozyme and insulin (the assignments were based on ref. 3-8).

| Assignment                                                          | Normal Raman lysozyme | SERS lysozyme (solution) | SERS lysozyme (100°C heating) | Normal Raman Solid insulin | SERS insulin (100°C heating) |
|---------------------------------------------------------------------|-----------------------|--------------------------|-------------------------------|----------------------------|------------------------------|
| Amide I and or H <sub>2</sub> O                                     | 1676                  |                          | 1669                          | 1681                       | 1665                         |
|                                                                     | 1654                  | 1646                     |                               | 1659                       |                              |
| Trp <sup>w1</sup> , Tyr, and/or Phe(v <sub>8a</sub> )               | 1619                  |                          | 1618                          | 1613                       | <b>1618</b>                  |
|                                                                     |                       |                          |                               | 1606                       | 1607                         |
| Trp <sup>w2</sup> and/or Phe(v <sub>8b</sub> )                      | 1580                  | NO                       | 1579                          | 1587                       |                              |
| Trp <sup>w3</sup> and/or Amide II                                   | 1553                  | 1545                     | <b>1553<sup>a</sup></b>       | 1556                       | 1556                         |
| His                                                                 | 1492                  |                          |                               | 1517                       |                              |
| δ(CH <sub>2</sub> )                                                 | 1458,                 |                          |                               | 1461                       |                              |
|                                                                     | 1449                  |                          | 1449                          | 1449                       | 1449                         |
| Tyr and/or δ(CH) <sub>indole ring</sub>                             | 1422                  | 1424                     | 1420                          | 1423                       |                              |
|                                                                     |                       |                          |                               | 1415                       |                              |
| Trp <sup>w7</sup>                                                   | 1360                  |                          | <b>1359</b>                   | <b>NO</b>                  | <b>NO</b>                    |
| Trp <sup>w7</sup> and/or δ(CH)                                      | 1337                  |                          | <b>1340</b>                   | 1342                       |                              |
|                                                                     |                       |                          |                               | 1319                       |                              |
| Amide III                                                           | 1273                  |                          | 1273                          | 1281                       |                              |
|                                                                     | 1254                  |                          |                               | 1267                       |                              |
|                                                                     | 1245                  | 1237                     | 1236                          | 1244                       | 1234                         |
| Tyr and/or Phe(v <sub>7a</sub> )                                    | 1207                  |                          | 1208                          | 1206                       | <b>1207</b>                  |
| Tyr and/or Phe(v <sub>9a</sub> )                                    | 1177                  |                          | 1182                          | 1174                       | <b>1177</b>                  |
| v(CN)                                                               | 1154                  |                          |                               | 1158                       |                              |
|                                                                     | 1128                  | 1121                     | 1128                          | 1128                       | 1128                         |
|                                                                     | 1106                  | 1101                     | 1101                          | 1111                       |                              |
|                                                                     | 1078                  |                          |                               | 1082                       |                              |
|                                                                     |                       |                          |                               | 1063                       |                              |
| NO <sub>3</sub>                                                     |                       | 1049                     | 1049                          |                            | 1049                         |
| Phe(v <sub>18a</sub> )                                              | 1031                  |                          |                               | 1032                       | 1032                         |
| Trp <sup>w16</sup>                                                  | 1011                  |                          |                               |                            |                              |
| Phe(v <sub>12</sub> )                                               | 1006                  | 1007                     | 1007                          | 1004                       | 1005                         |
| v(CC)                                                               | 979                   |                          |                               |                            | 989                          |
|                                                                     | 960                   | 951                      | 958                           | 960                        | 954                          |
|                                                                     | 933                   | 935 <sup>a</sup>         | 934 <sup>a</sup>              | 946                        | 944, 934 <sup>b</sup>        |
|                                                                     | 904                   |                          | 904                           | 895                        | 904                          |
| Trp <sup>w17</sup>                                                  | 876                   | 878                      | <b>878</b>                    | <b>NO</b>                  | <b>NO</b>                    |
| Tyr                                                                 | 859                   | 846                      | 853                           | 853                        | <b>853</b>                   |
| Tyr                                                                 | 837                   | 836                      | 829                           | 829                        | <b>829</b>                   |
|                                                                     |                       |                          | 809                           |                            | 809                          |
|                                                                     |                       |                          |                               | 768 (?)                    |                              |
| Trp <sup>w18</sup>                                                  | 761                   | 760                      | <b>761</b>                    | <b>NO</b>                  | <b>NO</b>                    |
| v(CS) and/or Trp <sup>w19</sup> and/or NO <sub>3</sub> <sup>-</sup> |                       |                          |                               | 744                        |                              |
|                                                                     | 722                   | 716                      | 722                           | 723                        | <b>722</b>                   |
| v(CS)                                                               | 695                   |                          | 680                           |                            |                              |
|                                                                     | 666                   | 659                      | 662                           | 665                        | 662                          |
| Tyr                                                                 | 645                   | 643                      | 646                           | 644                        | 646                          |
| Phe(v <sub>6b</sub> )                                               | 623                   |                          | NO                            | 622                        | 623                          |
| Trp                                                                 | 575                   | 581                      | NO                            |                            |                              |
| Trp                                                                 | 537                   |                          | 538                           |                            |                              |
|                                                                     |                       |                          |                               | 561(?)                     |                              |
| v(SS)                                                               | 508                   | 525                      | 520                           | 512                        | <b>515</b>                   |
| Phe or Tyr                                                          | 428                   | 438 (?)                  | 426                           | 422                        | 430                          |

a: Red, green and blue represent bands of trp, tyr and v(CS)/ v(SS), respectively.

b: Partly from v<sub>s</sub> (C-COO<sup>-</sup>).

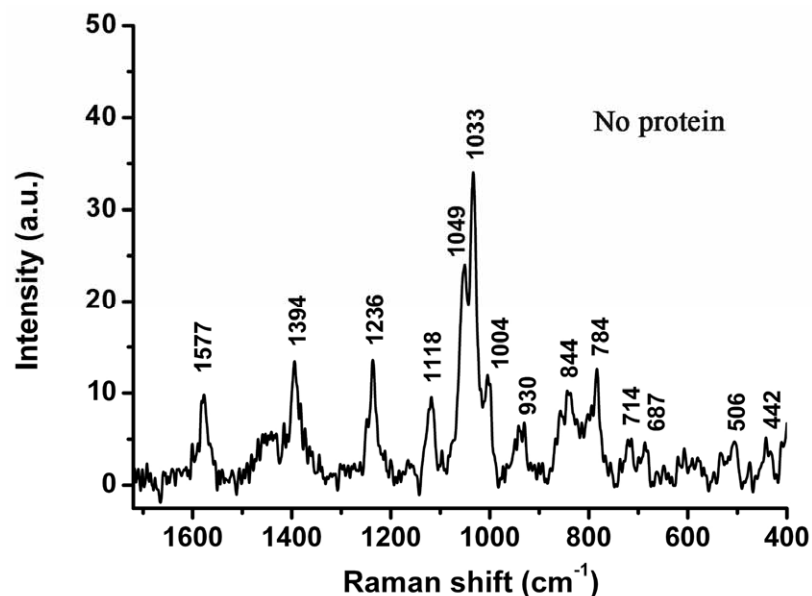

Figure I. A SERS spectrum of a dry film of a solution containing 6mM NaNO<sub>3</sub>. There was no protein in the sample. Drying temperature was 100 °C. The NaNO<sub>3</sub> was dissolved in a 5 mM citrate buffer. Except for the peak at 1049 cm<sup>-1</sup> due to NO<sub>3</sub><sup>-</sup> ion, all other peaks are assignable to citrate ion (ref 2).

Table 2 The number and appearance probability of the amino acids whose peaks dominate in SERS spectra

|     | Lysozyme (129 amino acids) |                        | Insulin (51 amino acids) |                        |
|-----|----------------------------|------------------------|--------------------------|------------------------|
|     | Number                     | Appearance probability | Number                   | Appearance probability |
| Trp | 6                          | 0.047                  | 0                        | 0                      |
| Tyr | 3                          | 0.023                  | 4                        | 0.078                  |
| Phe | 3                          | 0.023                  | 3                        | 0.059                  |
| S-S | 4                          | 0.031                  | 3                        | 0.059                  |

## References

- (1) Lee, P. C. and Meisel D. *J. Phys. Chem.* **1990**, *86*, 3391-3395
- (2) Munro, C. H.; Smith, W. E.; Garner, M.; Clarkson, J.; White, P.C. *Langmuir* **1995**, *11*, 3712-3720

- (3) Podstawka E.; Ozaki Y.; Proniewicz L.M. *Appl. Spectrosc.* **2004**, *58*, 1147-1156
- (4) Stewart, S.; Fredericks, P. M. *Spectrochim. Acta, Part A* **1999**, *55*, 1615-1640
- (5) Kumar, G.V.P; Selvi, R.; Kishore, A. H.; Kundu, T. ; Narayana, C. *J. Phys. Chem. B* **2008**, *112*, 6703-6707
- (6) Kumar, G.V. P; Reddy, B. A. A.; Arif, M.; Kundu, T; Narayana, C. *J. Phys. Chem. B* **2006** *110*, 16787-16792
- (7) Yu, N.; Jo, B.H. *Arch. Biochem. Biophys.* **1973**,*156*, 469-474
- (8) Chen, M. C.; Lord, R. C.; Mendelsohn. R. *Biochim. Biophys. Acta* **1993**,*328*, 252-260
